# Supplementary material
Source: PubMed Central journal article supplement (PMC9749922)
Supplement: mmc1.pdf [file mmc1.pdf]

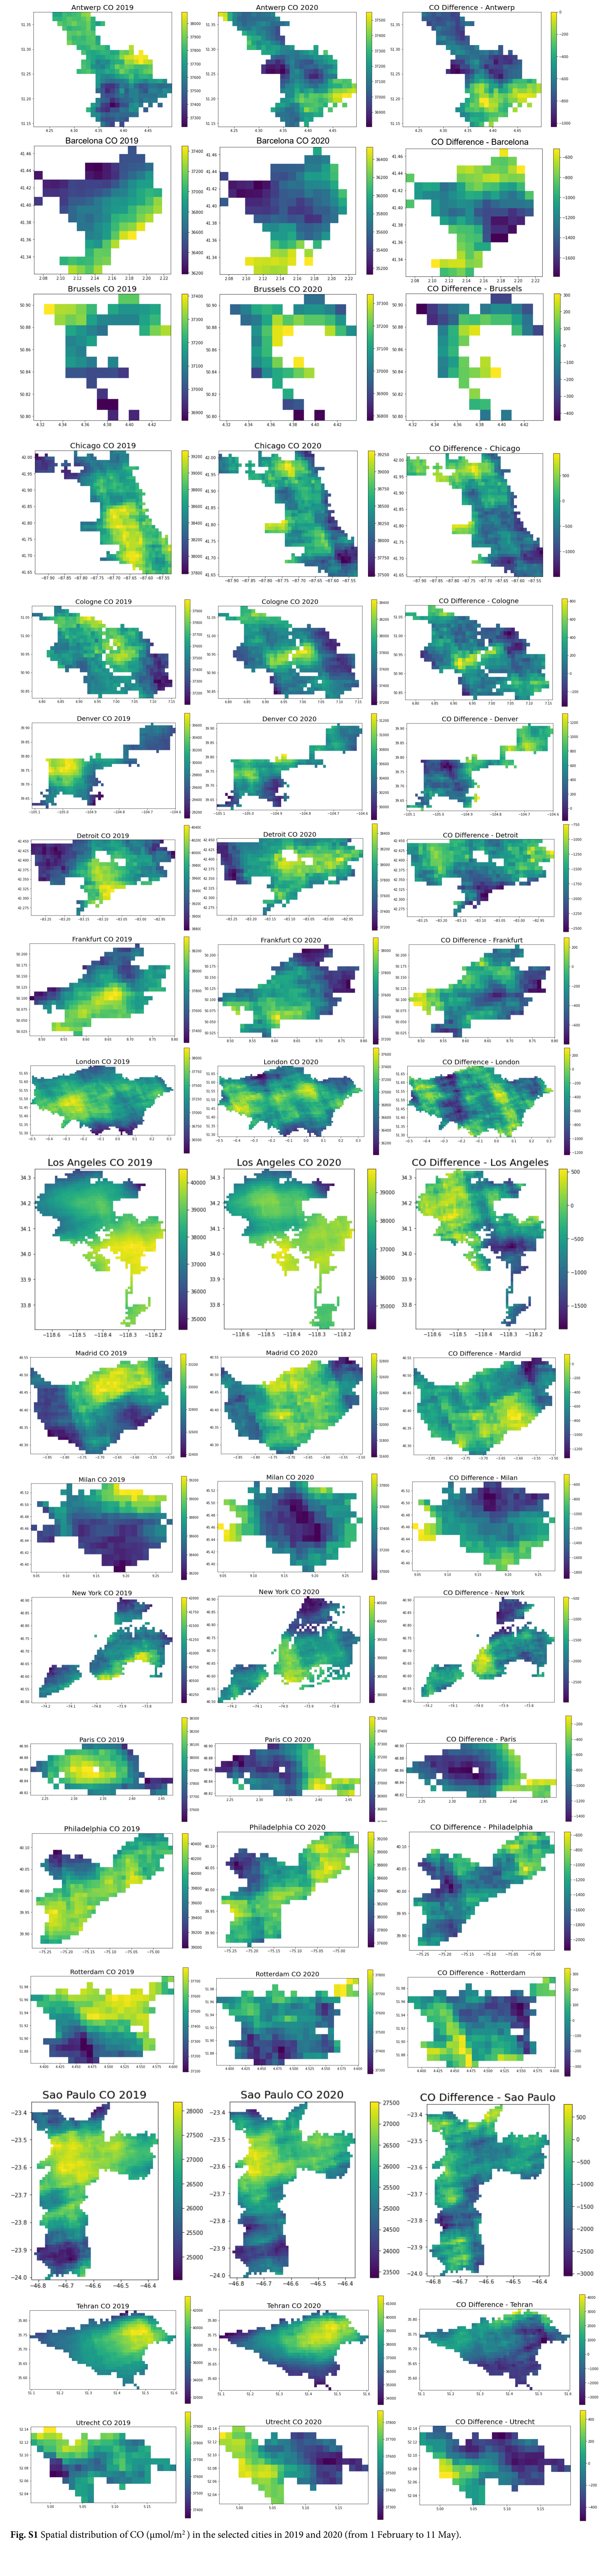

Fig. S1 Spatial distribution of CO ( $\mu\text{mol}/\text{m}^2$ ) in the selected cities in 2019 and 2020 (from 1 February to 11 May).

### Retail and recreation

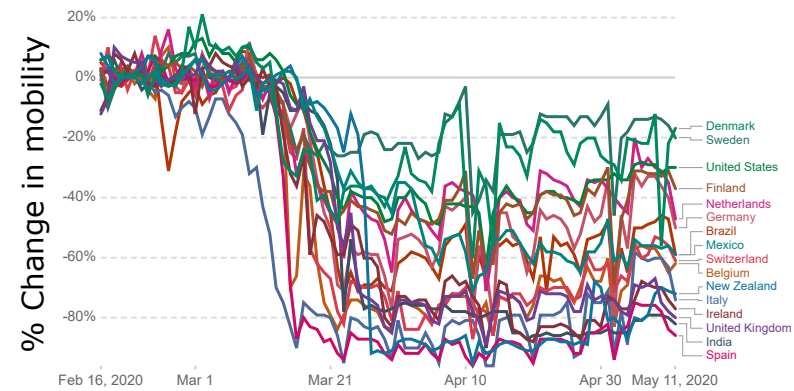

### Grocery and pharmacy stores

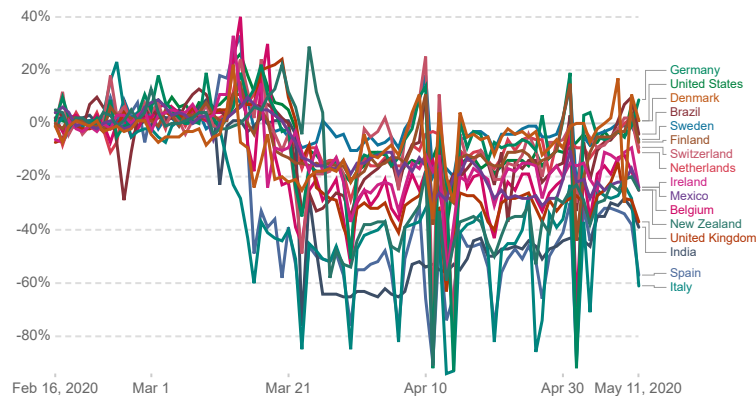

### Transit

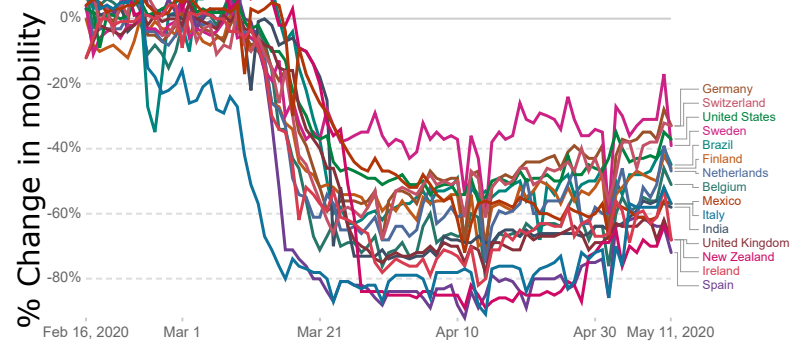

### Parks and outdoor

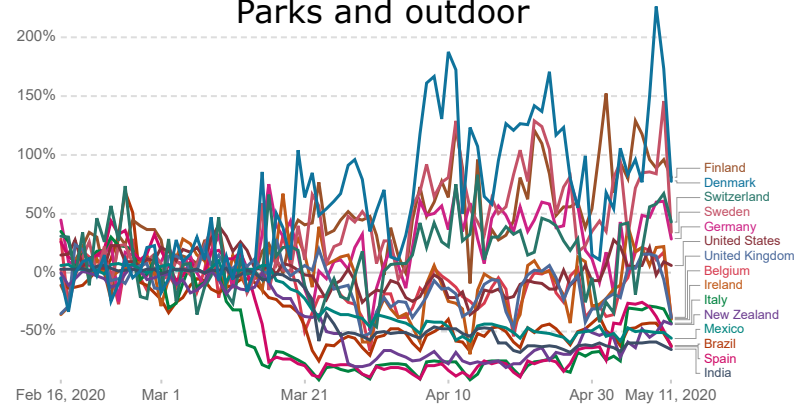

### Workplace visitors

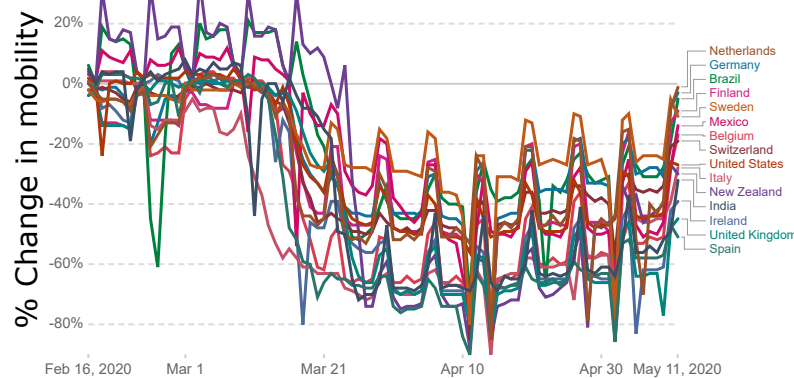

### Time spent at home

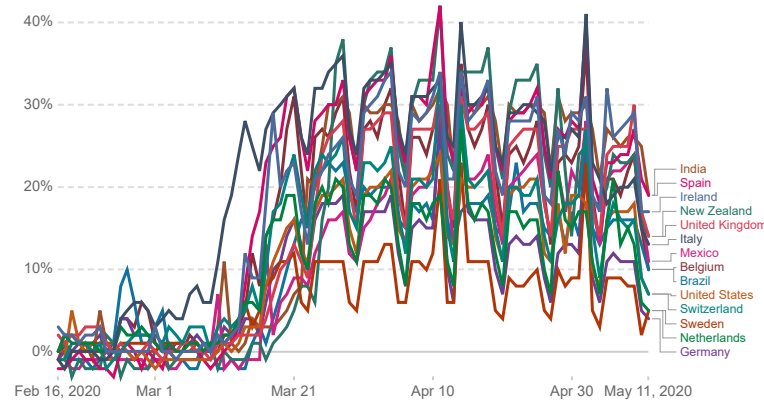

**Fig. S2** Changes in human mobility observed during the lock down period in different countries. Six mobility components, i.e. retail and recreation, grocery and pharmacy, transit, parks and outdoor, workplace visitors, and time spent at home were considered and evaluated in this study.

### Public transport stations

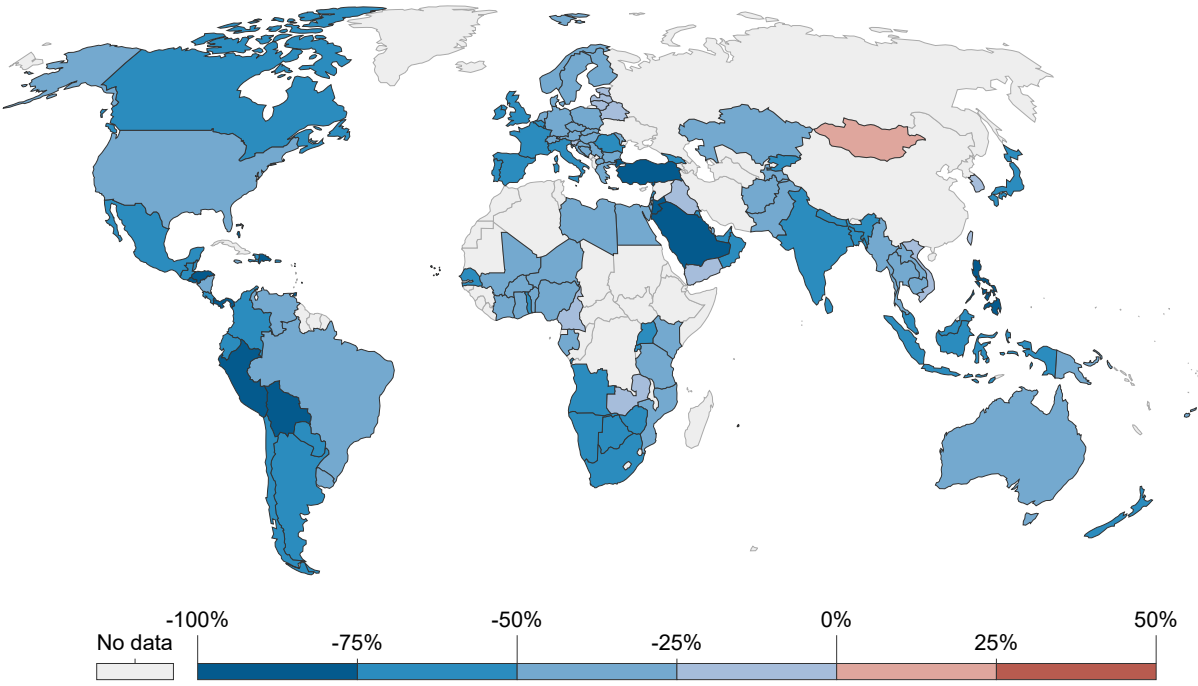

### Parks and outdoor spaces

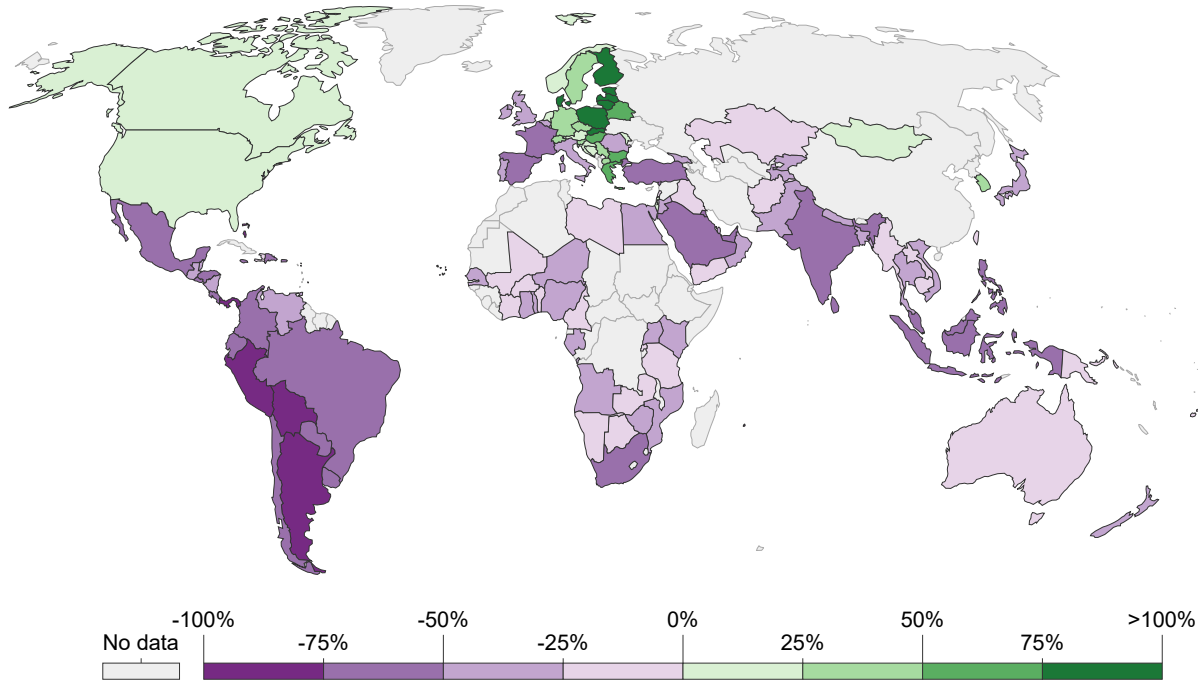

**Fig. S3** Spatial variability of public transport and parks/outdoor mobility during the lock down period.

## Retail and recreation

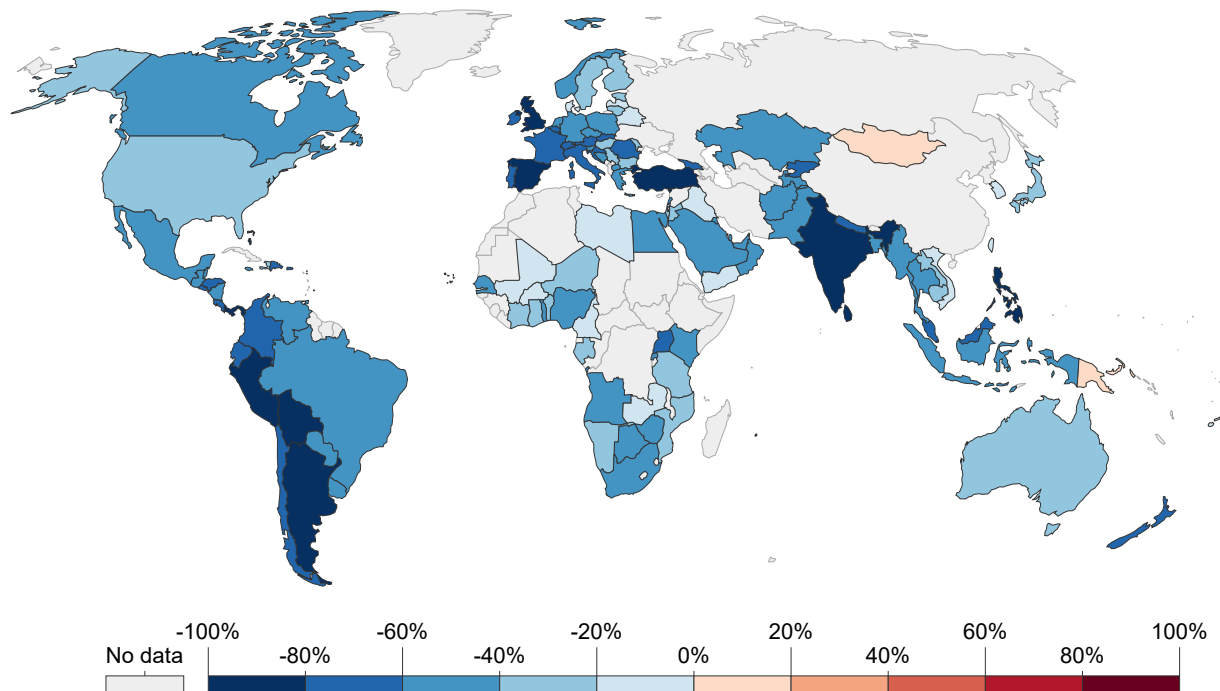

## Grocery and pharmacy stores

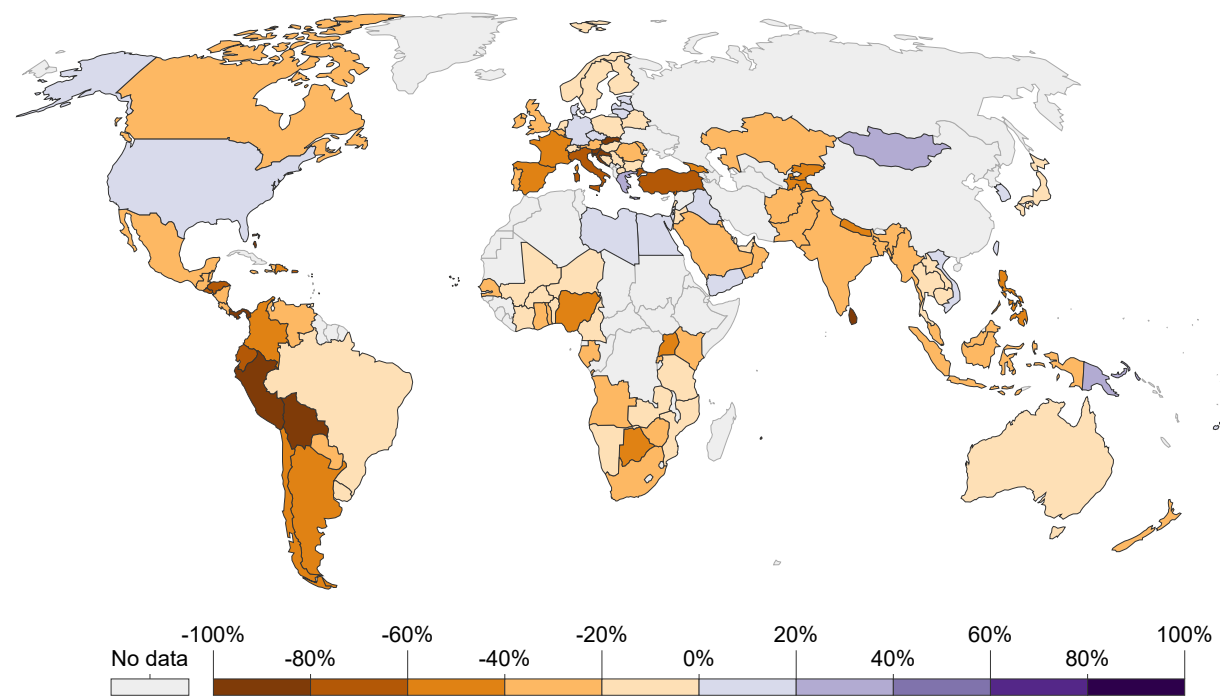

**Fig. S4** Spatial variability of retail/recreation and grocery/pharmacy mobility during the lock-down period.



### Workplace visitors

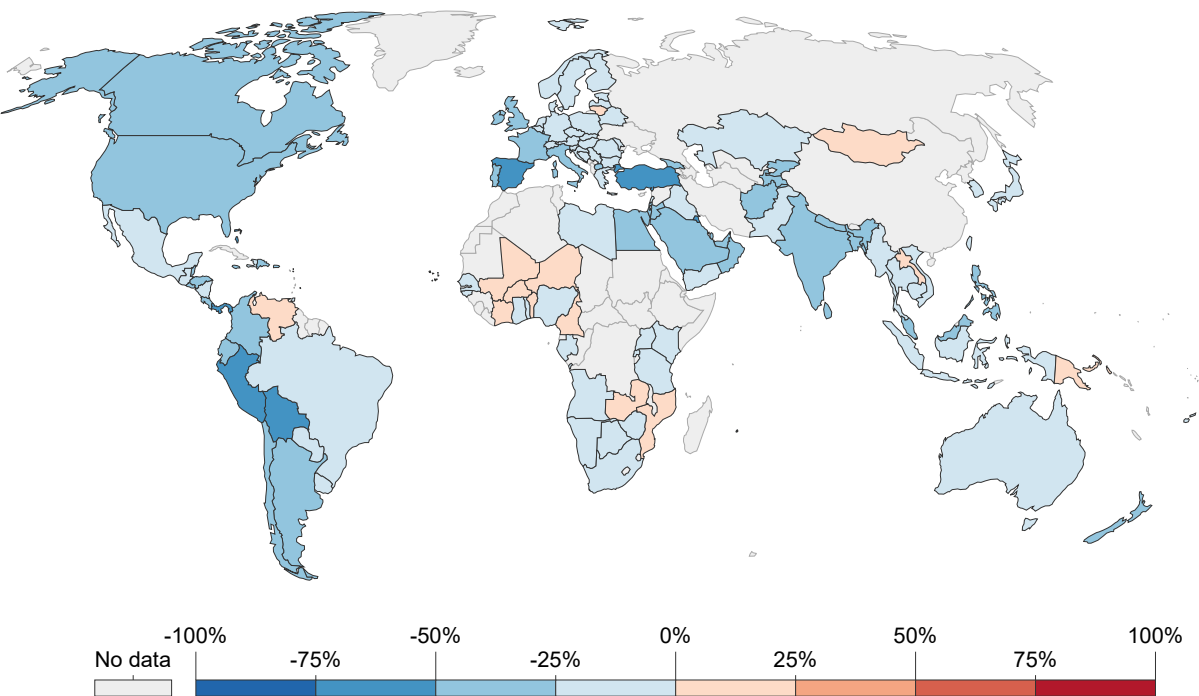

### Time spent at home

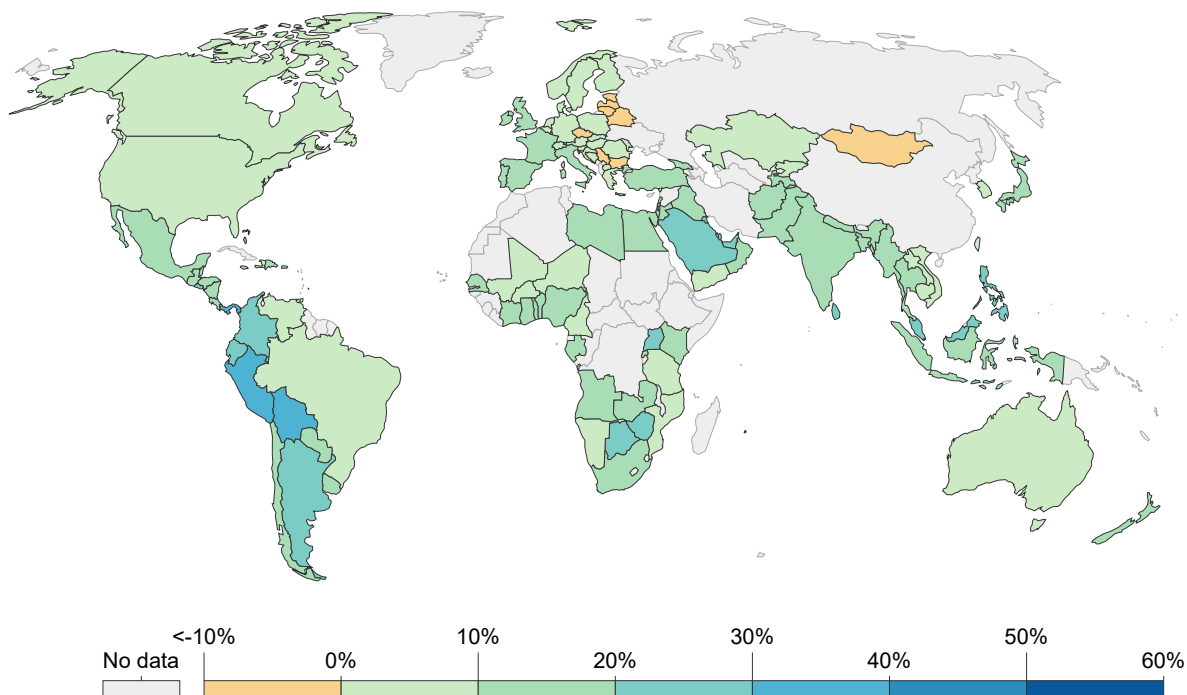

**Fig. S5** Spatial variability of workplace and residential mobility during the lock down period.
